# Supplementary material for: Hybrid Approach for Shelf Monitoring and Planogram Compliance (Hyb-SMPC) in Retails Using Deep Learning and Computer Vision
Source: Hindawi journal article supplement (doi:10.1155/2022/4916818), 2022-06-15
Supplement: f1 [file 4916818.f1.docx]

# Annexure

**Retailer Group**

**S1:** The system is very easy to use

**S2:** The system helps me to track the quantity of the products

**S3:** The system helps in inventory management

**S4:** The system checks the product placement efficiently

**S5:** It saves time of the staff

**S6:** The system enhances the overall sale of the products

**S7:** The reporting mechanism is very efficient

**S8:** I find the system difficult to use

**S9:** The system wastes a lot of time

**S10:** The system is cumbersome for the staff

**S11:** I think I would need technical support to use the system

**S12:** I think there was inconsistency in the system

**S13:** I need to learn the difficult technical things before using the whole system

**S14:** I do not feel comfortable using the system

**Customer Group**

**S1:** I think properly organized product in store saves a lot of customer’s time

**S2:** It is more convenient to shop from those stores which have organized all relevant products at one place

**S3:** I will shop more often from the stores which saves my time and energy to find the products of my need

**S4:** I will frequently visit those stores which do not bother to refill the sold-out products

**S5:** I will visit the store, if I do not find there all items of my need.

**S6:** The properly organized products do not help in shopping the things efficiently
